# Supplementary material for: Some thoughts about the single crystal growth of small molecules
Source: Royal Society of Chemistry journal article supplement (doi:10.1039/c1ce05624g), 2011-12-03
Supplement: c1ce05624g.pdf [file c1ce05624g.pdf]

Electronic Supplementary Information (ESI) for:

## Some thoughts about the single crystal growth of small molecules

Bernhard Spingler,\* Stephan Schnidrig, Ferdinand Wild

### Experimental methods

Most chemicals were purchased from Sigma-Aldrich. Tetrahydropyran and 1,2-difluorobenzene were from ABCR. Tablet tubes (40 mm x 12.75 mm) were from Müller-Krempel (Switzerland). Glass scintillation vials (20 ml, 61 mm x 28 mm) were from Wheaton.

Single crystal data were collected at 183(2) K on an Oxford Diffraction Xcalibur system with a Ruby detector using Mo K $\alpha$  radiation ( $\lambda = 0.7107 \text{ \AA}$ ) that was graphite-monochromated. A suitable crystal was covered with oil (Infineum V8512, formerly known as Paratone N), mounted on top of a glass fibre and immediately transferred to the diffractometer. The program suite CrysAlis<sup>Pro</sup> was used for data collection, multi-scan absorption correction and data reduction.<sup>1</sup> The structures were solved with direct methods using SIR97<sup>2</sup> and refined by full-matrix least-squares methods on F<sup>2</sup> with SHELXL-97.<sup>3</sup> The final structures were checked for higher symmetry with help of the program Platon.<sup>4</sup> CCDC 849680 and 800843 contain the supplementary crystallographic data for this paper. These data can be obtained free of charge from The Cambridge Crystallographic Data Centre via [www.ccdc.cam.ac.uk/data\\_request/cif](http://www.ccdc.cam.ac.uk/data_request/cif).

Powder X-ray diffraction (XRD) was performed at room temperature on a STOE STADI P diffractometer in transmission mode (flat sample holders, Ge monochromator and Cu K $\alpha_1$  radiation).

**Table S1: Crystallographic data for 1 and 2.**

| Compound                                         | <b>1</b>                                                      | <b>2</b>                                        |
|--------------------------------------------------|---------------------------------------------------------------|-------------------------------------------------|
| Empirical formula                                | C <sub>24</sub> H <sub>22</sub> N <sub>4</sub> O <sub>4</sub> | C <sub>12</sub> H <sub>11</sub> NO <sub>2</sub> |
| Space group                                      | P2 <sub>1</sub> /c                                            | P-1                                             |
| a [Å]                                            | 9.3329(2)                                                     | 7.5975(5)                                       |
| b [Å]                                            | 12.7049(3)                                                    | 12.2026(7)                                      |
| c [Å]                                            | 9.1195(2)                                                     | 12.8137(8)                                      |
| $\alpha$ [°]                                     | 90                                                            | 61.607(6)                                       |
| $\beta$ [°]                                      | 98.085(2)                                                     | 77.247(5)                                       |
| $\gamma$ [°]                                     | 90                                                            | 78.353(5)                                       |
| Volume [Å <sup>3</sup> ]                         | 1070.59(4)                                                    | 1012.74(11)                                     |
| Z                                                | 2                                                             | 4                                               |
| Crystal size [mm <sup>3</sup> ]                  | 0.50 x 0.27 x 0.11                                            | 0.21 x 0.13 x 0.08                              |
| Independent reflections                          | 3660 [R(int) = 0.0209]                                        | 5457 [R(int) = 0.0402]                          |
| Reflections observed (>2 $\sigma$ (I))           | 3116                                                          | 2329                                            |
| Completeness to theta                            | 99.9 % to 30.44°                                              | 99.9 % to 29.13°                                |
| Max. and min. transmission                       | 0.9898 and 0.7360                                             | 0.9928 and 0.8558                               |
| Data / restraints / parameters                   | 3660 / 0 / 146                                                | 5457 / 0 / 273                                  |
| Goodness-of-fit on F <sup>2</sup>                | 1.032                                                         | 0.810                                           |
| Final R indices (I>2 $\sigma$ (I))               | R1 = 0.0464, wR2 = 0.1216                                     | R1 = 0.0479, wR2 = 0.0782                       |
| Largest diff. peak and hole [e.Å <sup>-3</sup> ] | 0.405 and -0.223                                              | 0.163 and -0.268                                |

Figure S1:

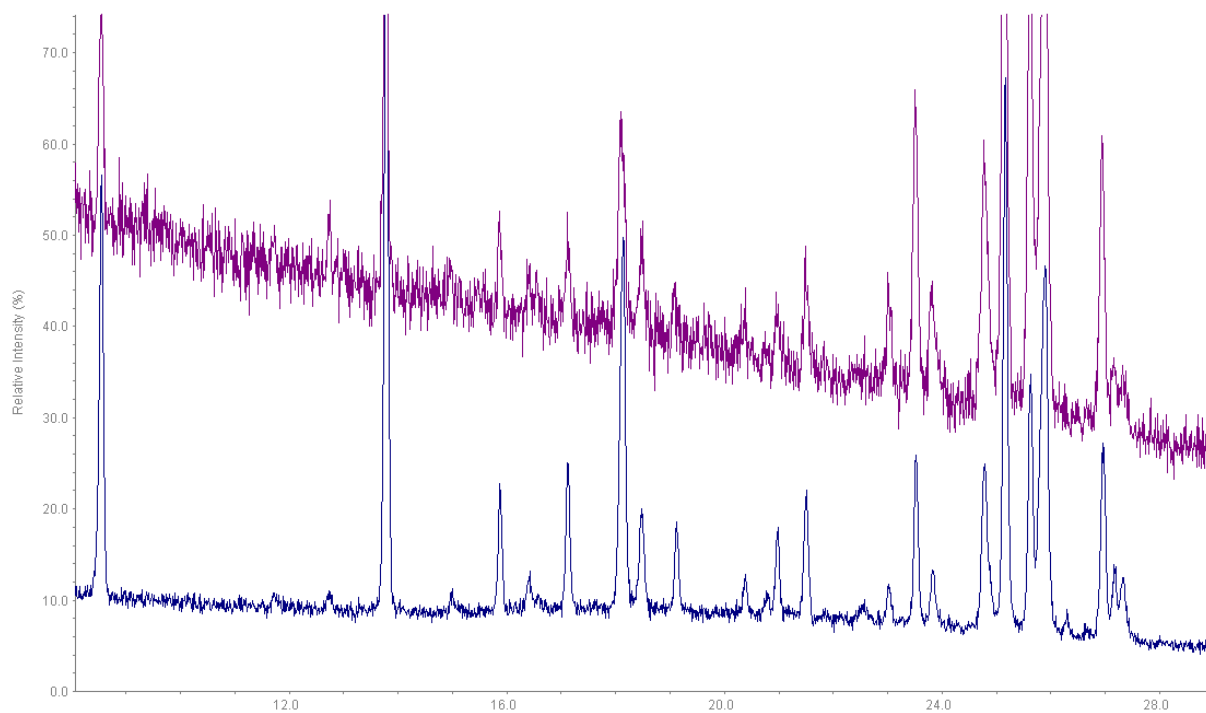

Fig. S1: Powder diffractograms of **2** grown from either chloroform against cyclohexane (top) or trichloroethylene against heptane (bottom).

1. Oxford Diffraction Ltd., *CrysAlis<sup>Pro</sup> Software system*, (2007), Oxford, UK.
2. A. Altomare, M. C. Burla, M. Camalli, G. L. Cascarano, C. Giacovazzo, A. Guagliardi, A. G. G. Moliterni, G. Polidori and R. Spagna, *J. Appl. Cryst.*, 1999, **32**, 115-119.
3. G. M. Sheldrick, *Acta Crystallogr D*, 2008, **A64**, 112-122.
4. A. L. Spek, *J. Appl. Cryst.*, 2003, **36**, 7-13.
